# Supplementary material for: A novel locus in CSMD1 gene is associated with increased susceptibility to severe malaria in Malian children
Source: Front Genet. 2024 May 24;15:1390786. doi: 10.3389/fgene.2024.1390786 (PMC11157005; doi:10.3389/fgene.2024.1390786)
Supplement: Supplementary file 1 [file Table2.XLSX]

## Sheet: REC
Supplementary Table.2.		Associations of selected human candidate genes polymorphisms and risk of SM in a cohort of Malian children determined by Logistic regression analaysis
CHR	SNP	Genomic Position	ALT allele	MOI	OR	P	P-adjusted (1000 permutation)
2	rs56260128	136867815	T	REC	1.543	0.4	0.5
				DOM	0.8	0.5
				ADD	0.9	0.7
2	rs13429534	136920412	G	REC	3.366	0.1	0.4
				DOM	1.286	0.3843
				ADD	1.429	0.1435
2	rs10166002	137099801	C	REC	0.83	0.6125	1
				DOM	1.169	0.5309
				ADD	1.072	0.6853
3	rs113562487	2659219	_	REC	NA	NA	NA
				DOM	0.8048	0.5738
				ADD	0.7649	0.4849
5	rs382266	18062041	C	REC	0.5492	0.2717	0.7
				DOM	1.004	0.9882
				ADD	0.9267	0.6914
5	rs59266801	170563423	G	REC	1.09	0.8265	1
				DOM	0.884	0.6159
				ADD	0.9603	0.8226
5	rs6861762	170566384	T	REC	1.062	0.8775
				DOM	0.8876	0.6254
				ADD	0.9515	0.7819
5	rs4867613	170567624	T	REC	0.8339	0.7453	0.9
				DOM	0.7584	0.2805
				ADD	0.8394	0.3998
5	rs366388	180614008	C	REC	0.5415	0.1452	0.15
				DOM	1.183	0.5041
				ADD	0.9745	0.8836
5	rs448012	180619344	G	REC	0.716	0.2931	0.31
				DOM	1.026	0.924
				ADD	0.9468	0.7489	0.5
5	rs392227	180619934	T	REC	0.8066	0.4895
				DOM	0.9735	0.9194
				ADD	0.9486	0.758
6	rs62418762	92508980	T	REC	NA	NA	NA
				DOM	0.8859	0.7242
				ADD	0.8657	0.668
6	rs9491199	124602822	G	REC	NA	NA	NA
				DOM	0.8831	0.7747
				ADD	0.8404	0.6738
8	rs13340578	4095444	T	REC	1.81	0.02982	0.04
				DOM	0.8498	0.5147
				ADD	1.126	0.4618
8	rs7000720	4149547	C	REC	0.8325	0.5296	1
				DOM	1.003	0.9904
				ADD	0.926	0.6396
10	rs17136827	12422974	T	REC	1.16	0.7968	1
				DOM	0.9478	0.8313
				ADD	0.9751	0.9039
10	rs1644391	12826305	C	REC	0.7835	0.6263	0.6
				DOM	1.089	0.7295
				ADD	1.036	0.8542
11	rs4754664	100043057	C	REC	1.238	0.5912	0.6
				DOM
				ADD	0.933	0.708
11	rs7945782	100054524	A	REC	1.011	0.9772	1
				DOM	0.8649	0.5568
				ADD	0.9527	0.7898
11	rs10750480	100068606	C	REC	0.914	0.8732	1
				DOM	0.6683	0.1084
				ADD	0.7382	0.1529
12	rs1514902	128303230	G	REC	0.9125	0.7829	0.6
				DOM	1.373	0.2334
				ADD	1.14	0.4506
18	rs510668	3521043	C	REC	0.7522	0.6081	1
				DOM	0.9446	0.82
				ADD	0.925	0.6961
