# Supplementary material for: A novel locus in CSMD1 gene is associated with increased susceptibility to severe malaria in Malian children
Source: Front Genet. 2024 May 24;15:1390786. doi: 10.3389/fgene.2024.1390786 (PMC11157005; doi:10.3389/fgene.2024.1390786)
Supplement: Supplementary file 2 [file Table3.XLSX]

## Sheet: Sheet1
Supplementary Table.3. SNPs with regulatory features in LD (r>0.6) rs13340578 identified by LDproxy tool using African populations in 1000 Genome project v.3.
RS_Number	Coord	Alleles	Distance	Dprime	R2	FORGEdb	RegulomeDB	Column1
rs13340578	chr8:3952966	(C/T)	0	1	1	3	6
rs73658572	chr8:3954730	(G/C)	1764	0.9902	0.9646	NA	6
rs17068940	chr8:3953046	(T/C)	80	1	0.8663	4	7
rs13340606	chr8:3952623	(A/C)	-343	1	0.8663	6	6
rs73658571	chr8:3953360	(T/C)	394	1	0.8663	5	6
rs13340565	chr8:3952388	(G/A)	-578	1	0.8663	5	7
rs60391636	chr8:3953561	(T/C)	595	1	0.8635	5	6
rs143983495	chr8:3953578	(-/TTT)	612	1	0.8635	NA	.
rs61633150	chr8:3953586	(A/G)	620	1	0.8635	4	6
rs17068944	chr8:3953282	(C/G)	316	0.983	0.8584	4	7
rs13340613	chr8:3952784	(T/C)	-182	1	0.8581	5	7
rs17068949	chr8:3953954	(G/A)	988	0.9966	0.8576	5	5
rs7839158	chr8:3954057	(T/C)	1091	0.9966	0.8549	4	7
rs11440495	chr8:3954093	(-/A)	1127	0.9966	0.8549	NA	.
rs7816866	chr8:3954143	(G/T)	1177	0.9966	0.8549	5	6
rs58726138	chr8:3952278	(G/T)	-688	1	0.8528	4	5
rs60926575	chr8:3952326	(T/C)	-640	1	0.8501	5	5
rs59866162	chr8:3952233	(C/G)	-733	0.9931	0.849	3	5
rs59735099	chr8:3952223	(T/C)	-743	0.9931	0.8464	3	5
rs59286892	chr8:3953859	(G/A)	893	0.9795	0.8444	5	5
rs7816895	chr8:3954216	(G/A)	1250	0.9795	0.8444	5	6
rs7839451	chr8:3954263	(T/C)	1297	0.9795	0.839	4	7
rs61122982	chr8:3952167	(G/A)	-799	0.9965	0.839	6	5
rs17068953	chr8:3954681	(G/A)	1715	0.9727	0.8327	4	5
rs17068954	chr8:3954773	(G/A)	1807	0.9727	0.8327	4	7
rs6990225	chr8:3954821	(G/A)	1855	0.9727	0.8327	5	6
rs918916	chr8:3954870	(A/T)	1904	0.9727	0.8327	5	5
rs918917	chr8:3955025	(A/C)	2059	0.9727	0.83	4	5
rs7815908	chr8:3950008	(A/G)	-2958	0.9493	0.8108	2	5
rs59961277	chr8:3953854	(A/G)	888	0.9965	0.8006	5	5
rs7819946	chr8:3950194	(T/C)	-2772	0.9296	0.795	2	6
rs1863478	chr8:3931495	(C/G)	-21471	0.9282	0.7936	4	5
rs59471981	chr8:3955927	(TTTT/-)	2961	0.9229	0.7809	NA	NA
rs13340602	chr8:3950898	(C/G)	-2068	0.9068	0.7685	3	3a
rs10107611	chr8:3950542	(T/G)	-2424	0.9676	0.7206	5	5
rs59199244	chr8:3957229	(T/A)	4263	0.8532	0.7187	4	7
rs17068975	chr8:3957182	(G/C)	4216	0.8502	0.7158	4	6
rs7008527	chr8:3948366	(G/T)	-4600	0.9432	0.7107	2	7
rs7007103	chr8:3950965	(G/C)	-2001	0.9432	0.7084	3	5
rs2554640	chr8:3939228	(A/G)	-13738	0.8912	0.7033	2	7
rs2554644	chr8:3942072	(G/T)	-10894	0.9163	0.6983	5	7
rs2247851	chr8:3934982	(C/T)	-17984	0.9162	0.6959	2	7
rs2740897	chr8:3938980	(G/C)	-13986	0.8871	0.686	6	5
rs2554638	chr8:3938816	(G/T)	-14150	0.8869	0.6836	2	7
rs17068887	chr8:3946649	(C/T)	-6317	0.9054	0.6755	4	5
rs2554636	chr8:3937864	(T/C)	-15102	0.8988	0.672	2	7
rs57423877	chr8:3957021	(T/G)	4055	0.8487	0.6563	6	6
rs2740934	chr8:3936383	(A/C)	-16583	0.9105	0.648	3	7
rs1543903	chr8:3937264	(G/A)	-15702	0.8966	0.6342	4	6
rs2552126	chr8:3929850	(C/G)	-23116	0.9126	0.6254	2	7
rs2161929	chr8:3938349	(A/G)	-14617	0.8728	0.6142	4	5
rs12674985	chr8:3958021	(T/C)	5055	0.9153	0.6139	4	7
rs1365271	chr8:3926460	(C/T)	-26506	0.8093	0.6044	2	7
rs1543905	chr8:3937510	(T/C)	-15456	0.8945	0.6027	3	6
