# Supplementary material for: A novel locus in CSMD1 gene is associated with increased susceptibility to severe malaria in Malian children
Source: Front Genet. 2024 May 24;15:1390786. doi: 10.3389/fgene.2024.1390786 (PMC11157005; doi:10.3389/fgene.2024.1390786)
Supplement: Supplementary file 3 [file Table4.XLS]

## Sheet: HAploREG_SNPS_corrected
Supplementary Table.3.
Column1	Column2	Column3	Column4	Column5	Column6	Column7	Column8	Column9	Column10	Column11	Column12	Column13	Column14	Column15
rsID	chr	POS	r2	ref	alt	AFR	AMR	ASN	EUR	Chromatin_States	Chromatin_States_Imputed	Chromatin_Marks	DNAse	Motifs
rs1365271	8	4068938	0.62	C	T	0.59	0.87	0.97	0.85			E003,H3K27ac_Enh;E020,H3K27ac_Enh;E020,H3K9ac_Pro		CEBPA_1;Hsf_known1;Mef2_known5;Mef2_known6
rs1863478	8	4073973	0.8	C	G	0.65	0.87	0.97	0.84			E087,H3K4me1_Enh		Cdx2_1;Cdx2_2;Hoxa10;Hoxd10
rs2554638	8	4081294	0.68	G	T	0.59	0.77	0.68	0.81			E011,H3K4me3_Pro;E024,H3K4me1_Enh;E063,H3K4me1_Enh	E021	.
rs2740897	8	4081458	0.66	G	C	0.59	0.76	0.68	0.8			E011,H3K4me3_Pro;E028,H3K4me3_Pro;E024,H3K4me1_Enh;E063,H3K4me1_Enh		Mxi1_disc1;SIX5_known1;SREBP_disc1;SZF1-1;p300_disc7
rs2554640	8	4081706	0.67	A	G	0.59	0.77	0.67	0.81			E011,H3K4me3_Pro;E028,H3K4me3_Pro;E024,H3K4me1_Enh;E063,H3K4me1_Enh;E038,H3K27ac_Enh		Foxp3;Nkx3_1
rs2554644	8	4084550	0.62	G	T	0.58	0.76	0.68	0.82	E003,7_Enh;E008,7_Enh;E009,7_Enh;E014,7_Enh;E019,7_Enh;E020,7_Enh;E024,7_Enh	E001,17_EnhW2;E002,17_EnhW2;E003,17_EnhW2;E011,17_EnhW2;E014,17_EnhW2;E016,17_EnhW2;E018,17_EnhW2;E019,15_EnhAF;E020,17_EnhW2	E001,H3K4me1_Enh;E008,H3K4me1_Enh;E009,H3K4me1_Enh;E010,H3K4me1_Enh;E014,H3K4me1_Enh;E018,H3K4me1_Enh;E019,H3K4me1_Enh;E020,H3K4me1_Enh;E066,H3K4me1_Enh;E003,H3K27ac_Enh;E020,H3K27ac_Enh;E020,H3K4me3_Pro		Irf_known7;Sox_14;Sox_9
rs17068887	8	4089127	0.62	C	T	0.41	0.15	0.03	0.16	E009,7_Enh;E010,7_Enh;E054,7_Enh	E010,19_DNase;E053,19_DNase;E054,19_DNase;E067,19_DNase;E070,19_DNase;E081,19_DNase;E082,19_DNase	E009,H3K4me1_Enh;E010,H3K4me1_Enh;E054,H3K4me1_Enh;E073,H3K4me1_Enh;E081,H3K4me1_Enh	E081;E082;E090	TCF12_disc6
rs7008527	8	4090844	0.7	G	T	0.42	0.31	0.31	0.25			E020,H3K27ac_Enh		Foxj2_1;IRC900814
rs7815908	8	4092486	0.76	A	G	0.38	0.15	0.03	0.17					HNF1_7;Hoxb6;Pax7;Pou1f1_2;Pou2f2_known2;Pou2f2_known4;Prrx2_1;Sox_2
rs7819946	8	4092672	0.76	T	C	0.38	0.14	0.03	0.16					SP1_disc2;VDR_4
rs10107611	8	4093020	0.66	T	G	0.43	0.32	0.31	0.25					Ik-3
rs13340602	8	4093376	0.77	C	G	0.38	0.14	0.03	0.16					HNF1_3;HNF1_7;Mef2_known1;Mef2_known2;Mef2_known4;Mef2_known5;Mef2_known6;TATA_known1
rs7007103	8	4093443	0.66	G	C	0.43	0.22	0.23	0.25					GATA_known8;NRSF_known2;Pou5f1_known2
rs61122982	8	4094645	0.83	G	A	0.41	0.15	0.0017	0.16			E008,H3K9ac_Pro;E081,H3K4me1_Enh		RP58
rs59735099	8	4094701	0.83	T	C	0.41	0.15	0.0017	0.16			E008,H3K9ac_Pro;E081,H3K4me1_Enh		.
rs59866162	8	4094711	0.86	C	G	0.41	0.15	0.0017	0.16			E008,H3K9ac_Pro;E081,H3K4me1_Enh		GR_disc6
rs58726138	8	4094756	0.84	G	T	0.41	0.15	0.0017	0.16			E008,H3K9ac_Pro;E081,H3K4me1_Enh		Pax-5_disc3
rs60926575	8	4094804	0.85	T	C	0.41	0.16	0.0017	0.17			E008,H3K9ac_Pro;E081,H3K4me1_Enh	E051	NRSF_disc4;RXRA_disc2
rs13340565	8	4094866	0.86	G	A	0.41	0.14	0.0017	0.16			E008,H3K9ac_Pro;E081,H3K4me1_Enh		NF-I_1;RREB-1_1
rs13340606	8	4095101	0.86	A	C	0.41	0.14	0.0017	0.16			E008,H3K9ac_Pro;E081,H3K4me1_Enh	E022	Foxd1_1;Mef2_disc2;NF-AT;Pax-3_1;Sox_6;TCF11::MafG
rs13340613	8	4095262	0.85	T	C	0.41	0.14	0.0017	0.16			E008,H3K9ac_Pro;E081,H3K4me1_Enh		.
rs13340578	8	4095444	1	C	G,T	0.37	0.14	0.0017	0.16			E008,H3K9ac_Pro;E081,H3K4me1_Enh		.
rs17068940	8	4095524	0.86	T	C	0.41	0.14	0.0017	0.16			E008,H3K9ac_Pro;E081,H3K4me1_Enh		Pbx-1_4
rs17068944	8	4095760	0.83	C	G	0.39	0.14	0.0017	0.16			E081,H3K4me1_Enh		Hoxa3_1;Sp100
rs73658571	8	4095838	0.86	T	C	0.41	0.14	0.0017	0.16			E081,H3K4me1_Enh		DMRT2;Nanog_disc4;PLZF;Pou5f1_disc1;TEF-1_2
rs60391636	8	4096039	0.86	T	C	0.41	0.15	0.0017	0.16			E081,H3K4me1_Enh		Foxp1;GR_known10;GR_known3;RREB-1_2
rs61633150	8	4096064	0.86	A	G	0.41	0.14	0.0017	0.16			E081,H3K4me1_Enh		.
rs59961277	8	4096332	0.82	A	G	0.42	0.15	0.0017	0.16	E082,7_Enh	E010,19_DNase;E053,19_DNase;E054,19_DNase;E067,19_DNase;E068,19_DNase;E069,19_DNase;E070,19_DNase;E071,19_DNase;E072,19_DNase;E073,19_DNase;E074,19_DNase;E081,19_DNase;E082,19_DNase;E092,19_DNase;E100,19_DNase;E107,19_DNase	E004,H3K4me1_Enh;E081,H3K4me1_Enh;E082,H3K4me1_Enh	E055;E081;E082;E083;E089;E090	GATA_known8;TCF12_disc6
rs59286892	8	4096337	0.82	G	A	0.4	0.14	0.0017	0.16	E082,7_Enh	E010,19_DNase;E053,19_DNase;E054,19_DNase;E067,19_DNase;E068,19_DNase;E069,19_DNase;E070,19_DNase;E071,19_DNase;E072,19_DNase;E073,19_DNase;E074,19_DNase;E081,19_DNase;E082,19_DNase;E092,19_DNase;E100,19_DNase;E107,19_DNase	E004,H3K4me1_Enh;E081,H3K4me1_Enh;E082,H3K4me1_Enh	E081;E082;E083;E089;E090	GATA_known8
rs17068949	8	4096432	0.84	G	A	0.41	0.15	0.0017	0.16	E082,7_Enh	E010,19_DNase;E053,19_DNase;E054,19_DNase;E067,19_DNase;E068,19_DNase;E069,19_DNase;E070,19_DNase;E071,19_DNase;E072,19_DNase;E073,19_DNase;E074,19_DNase;E081,19_DNase;E082,19_DNase;E092,19_DNase;E100,19_DNase;E107,19_DNase	E004,H3K4me1_Enh;E081,H3K4me1_Enh;E082,H3K4me1_Enh	E081;E082;E083;E090;E092	HDAC2_disc6;HMG-IY_2;Nanog_disc1;Pax-4_5;Pou2f2_known1;Pou2f2_known10;SIX5_disc4;p300_disc5
rs7839158	8	4096535	0.86	T	C	0.41	0.14	0.0017	0.16	E082,7_Enh		E081,H3K4me1_Enh;E082,H3K4me1_Enh	E081	.
rs7816866	8	4096621	0.84	G	T	0.41	0.14	0.0017	0.16	E082,7_Enh		E081,H3K4me1_Enh;E082,H3K4me1_Enh		Hoxd10;Nkx2_10;Nkx6-1_1;Sox_18;Sox_5
rs7816895	8	4096694	0.82	G	A	0.4	0.14	0.0017	0.16	E081,7_Enh;E082,7_Enh		E081,H3K4me1_Enh;E082,H3K4me1_Enh		ATF3_known7;CEBPB_known4;Mrg1::Hoxa9_2;Pax-3_1;Whn
rs7839451	8	4096741	0.82	T	C	0.4	0.14	0.0017	0.16	E081,7_Enh;E082,7_Enh		E081,H3K4me1_Enh;E082,H3K4me1_Enh		GR_known3;GR_known9;Hoxd10;Mef2_known3
rs17068953	8	4097159	0.82	G	A	0.4	0.14	0.0017	0.16	E081,7_Enh;E082,7_Enh		E018,H3K9ac_Pro;E081,H3K4me1_Enh;E082,H3K4me1_Enh		Foxc1_2;Nkx3_2;Pou2f2_known1
rs17068954	8	4097251	0.82	G	A	0.4	0.14	0.0017	0.16	E081,7_Enh;E082,7_Enh		E018,H3K9ac_Pro;E081,H3K4me1_Enh;E082,H3K4me1_Enh		Ets_disc1;GATA_known8;Hdx;Pax-5_disc3;RXRA_disc4;STAT_known1;Sox_13
rs6990225	8	4097299	0.82	G	A	0.4	0.14	0.0017	0.16	E082,7_Enh		E018,H3K9ac_Pro;E081,H3K4me1_Enh;E082,H3K4me1_Enh		Pax-4_5;RXRA_known7;YY1_known2
rs918916	8	4097348	0.82	A	T	0.4	0.14	0.0017	0.16	E082,7_Enh		E016,H3K4me3_Pro;E018,H3K9ac_Pro;E081,H3K4me1_Enh;E082,H3K4me1_Enh		.
rs918917	8	4097503	0.82	A	C	0.4	0.14	0.0017	0.16	E082,7_Enh		E016,H3K4me3_Pro;E018,H3K9ac_Pro;E081,H3K4me1_Enh;E082,H3K4me1_Enh		PLZF;Pou2f2_disc1;TCF4_known2;ZBRK1
rs59471981	8	4098405	0.73	ATTTT	A	0.4	0.14	0.0017	0.16			E005,H3K9ac_Pro;E016,H3K4me3_Pro;E082,H3K4me1_Enh		ATF2;RORalpha1_1;RXRA_known3
rs57423877	8	4099499	0.62	T	G	0.39	0.14	0.0017	0.15			E008,H3K27ac_Enh;E066,H3K4me3_Pro;E066,H3K9ac_Pro;E088,H3K9ac_Pro	E005	Znf143_known1
rs17068975	8	4099660	0.68	G	C	0.38	0.14	0.0017	0.15			E066,H3K4me3_Pro;E066,H3K9ac_Pro;E088,H3K9ac_Pro		Pou2f2_known2;Smad_1
rs59199244	8	4099707	0.68	T	A	0.38	0.14	0.0017	0.15			E066,H3K4me3_Pro;E066,H3K9ac_Pro;E088,H3K9ac_Pro		.
